# Supplementary material
Source: PubMed Central journal article supplement (PMC3035479)
Supplement: NIHMS260202-supplement-02.pdf [file NIHMS260202-supplement-02.pdf]

**A**

**eGFP-Raf:ER**

High Copy

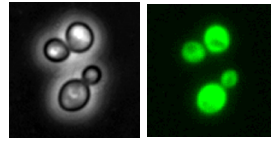

**MEK1-mCherry**

Low Copy

High Copy

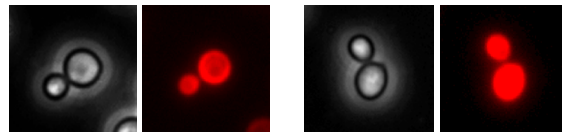

**mCherry-ERK2**

Low Copy

High Copy

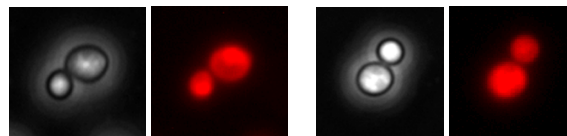

**B**

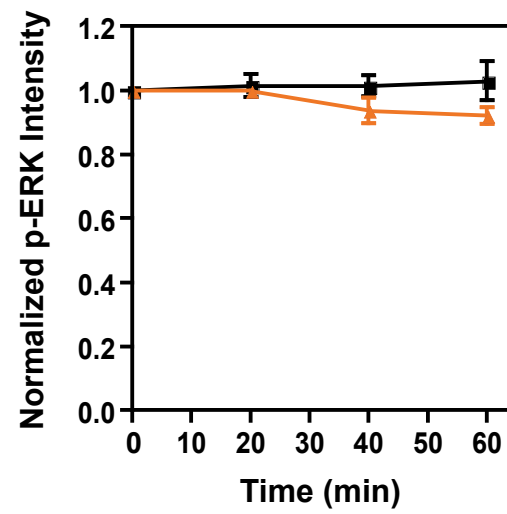

**Figure S1**

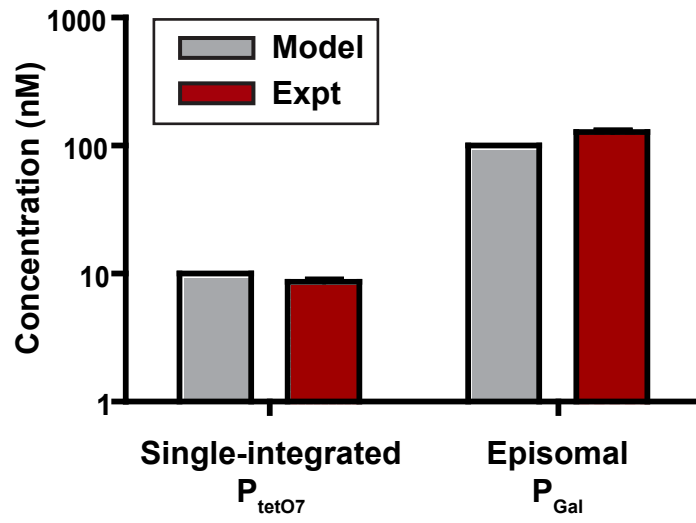

Figure S2

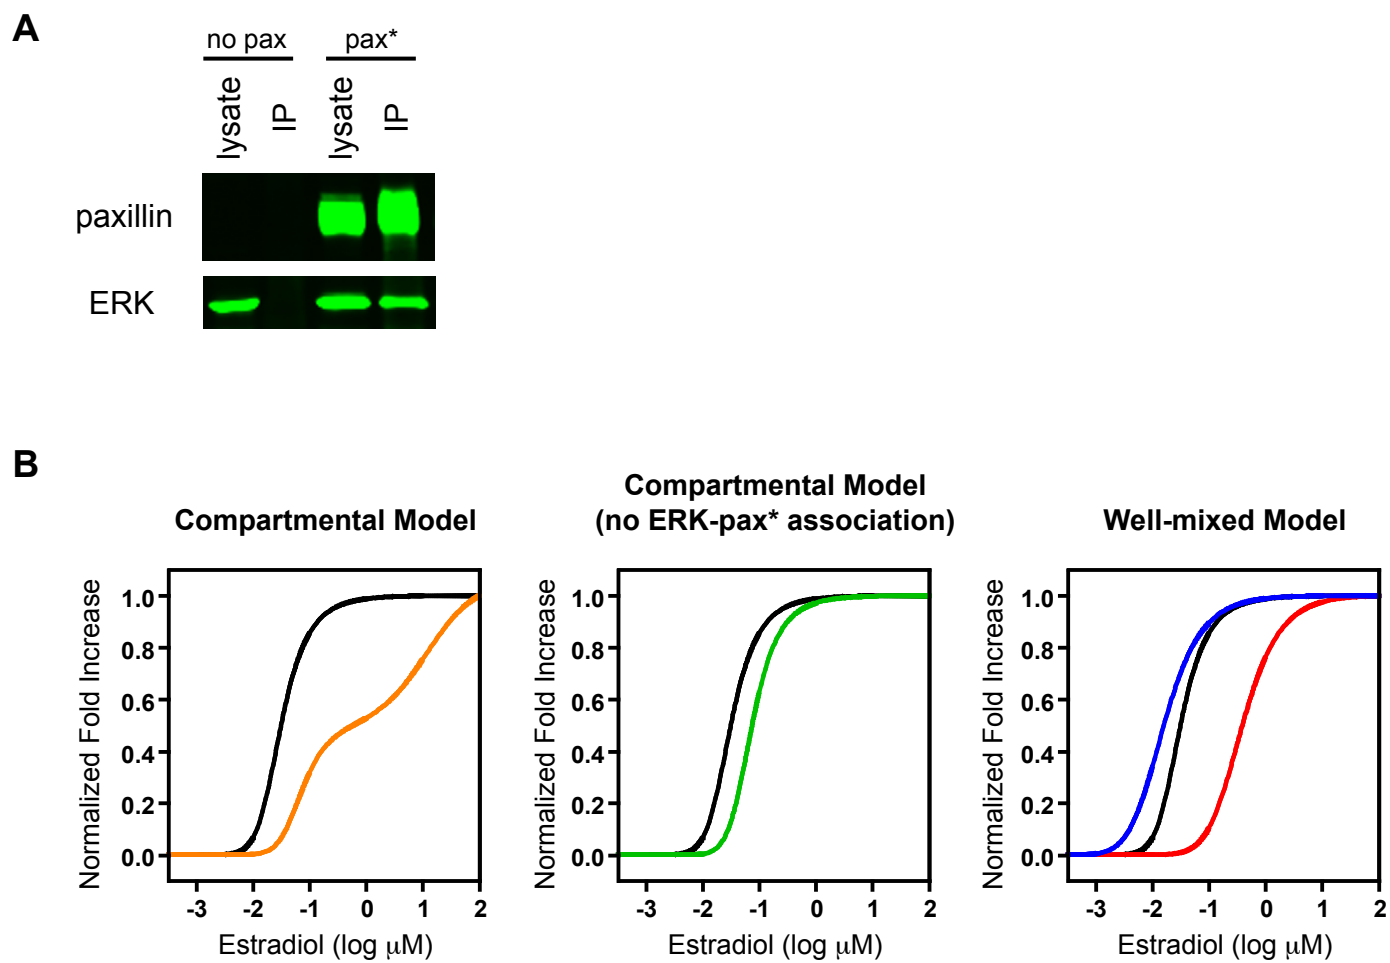

Figure S3

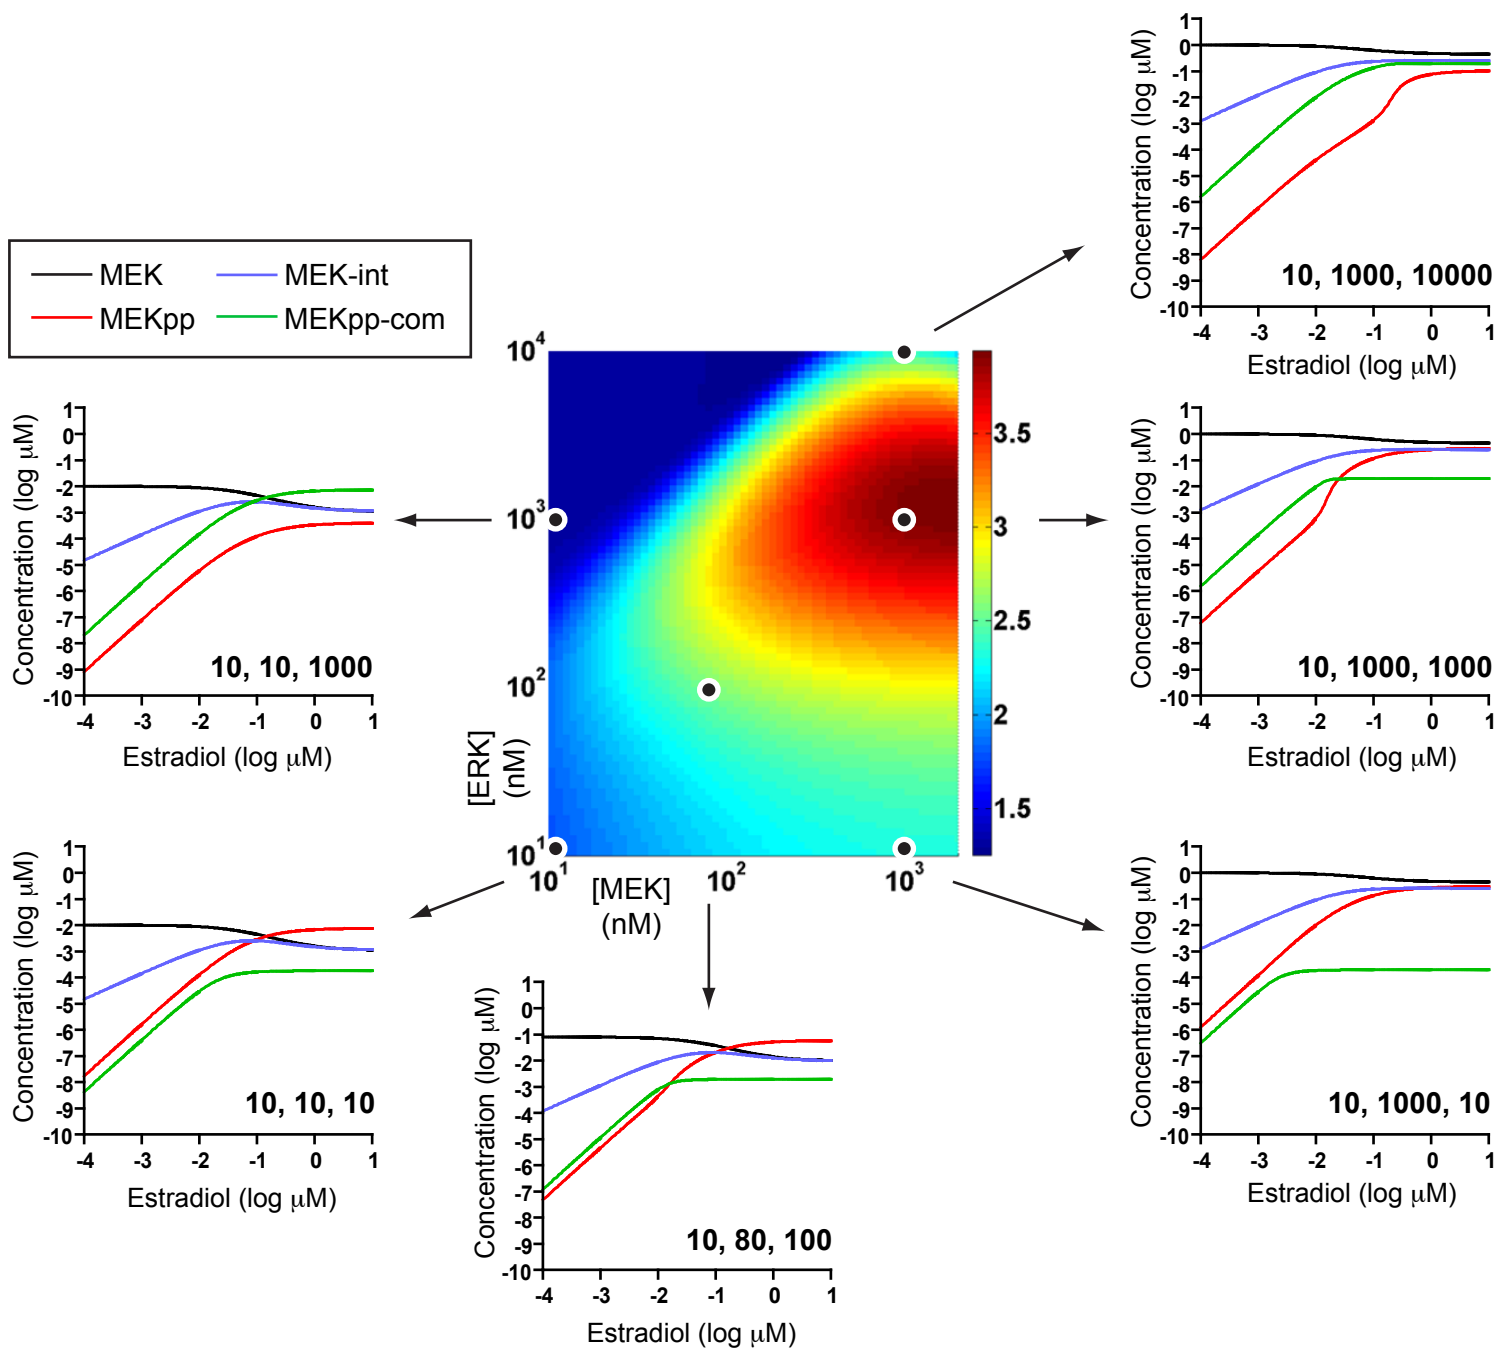

Figure S4

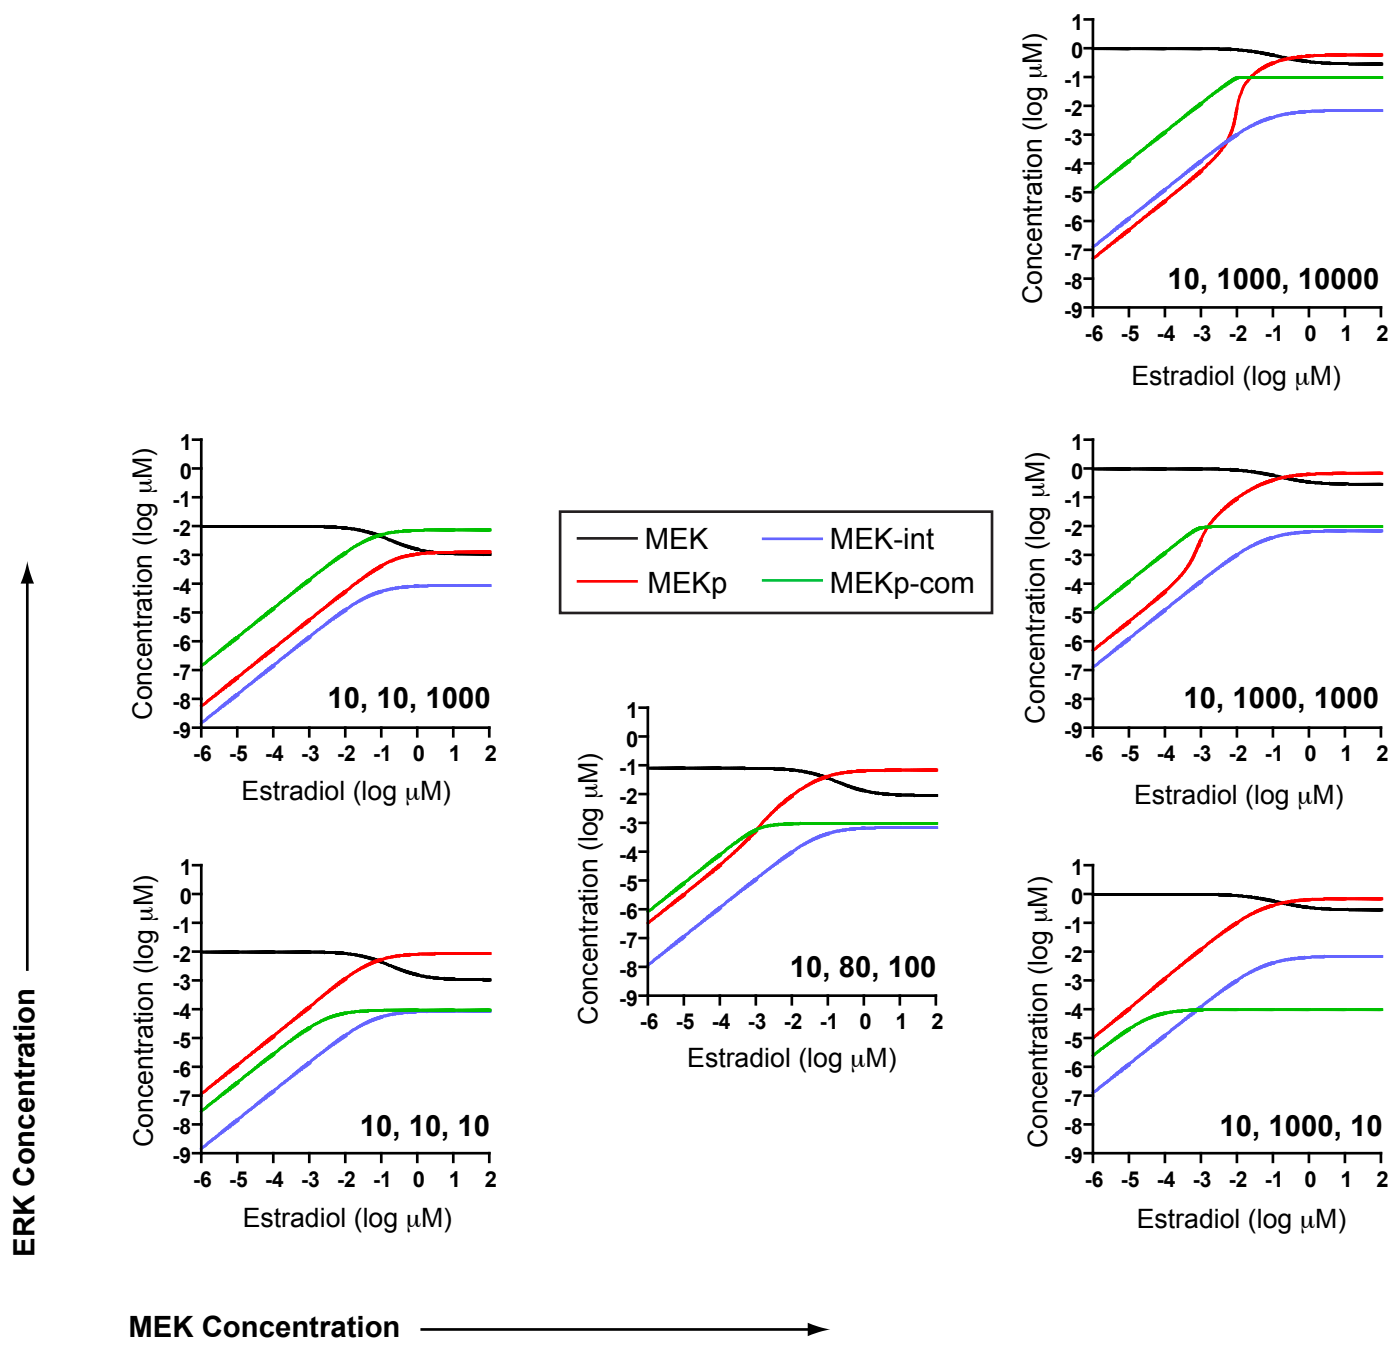

Figure S5
